# Supplementary material for: Alkaloid-induced asymmetric hydrogenation on bimetallic Pt@Cu cathodes under electrochemical conditions
Source: Royal Society of Chemistry journal article supplement (doi:10.1039/c7nj00844a), 2017-01-01
Supplement: c7nj00844a1.pdf [file c7nj00844a1.pdf]

Supplementary information for  
**Alkaloid-induced asymmetric hydrogenation on bimetallic Pt@Cu  
cathodes by electrochemical conditions**

Ying-Na Yue, Di Wu, Sheng Zeng, Man-Ping Yang, Huan Wang\* and Jia-Xing Lu\*

Shanghai Key Laboratory of Green Chemistry and Chemical Processes, School of Chemistry and  
Molecular Engineering, East China Normal University, Shanghai, 200062, China

Email: hwang@chem.ecnu.edu.cn, jxlu@chem.ecnu.edu.cn;

Tel: +86 21-52134935, +86 21-62233491

**1. Structure of cinchonidine (CD)**

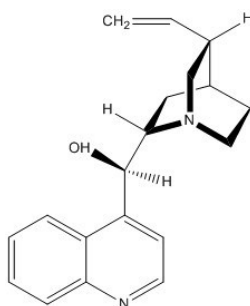

**Scheme S1**

**2. Definition of enantiomeric excesses (ee)**

$$ee = \frac{[R] - [S]}{[R] + [S]} \times 100$$

**Eq. S1**

**3. Characterization of Cu NPs**

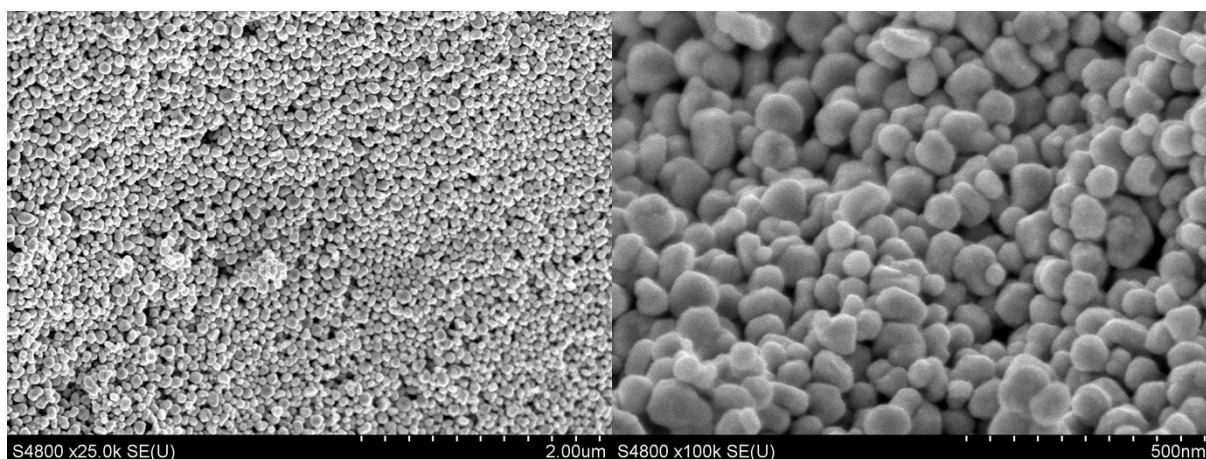

**Fig. S1** SEM patterns of Cu NPs with different magnification, (A) (25K), (B) (100K).

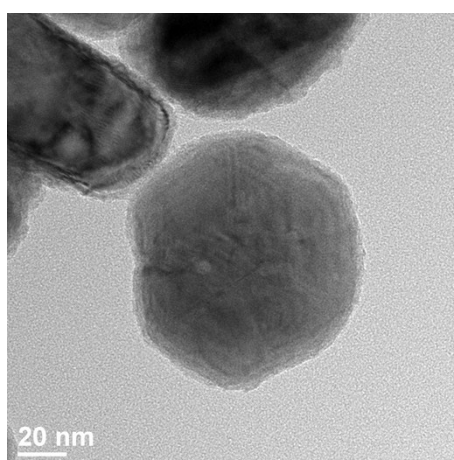

**Fig. S2** Low magnification TEM image of pure Cu NPs

#### 4. Characterization of specific surface area

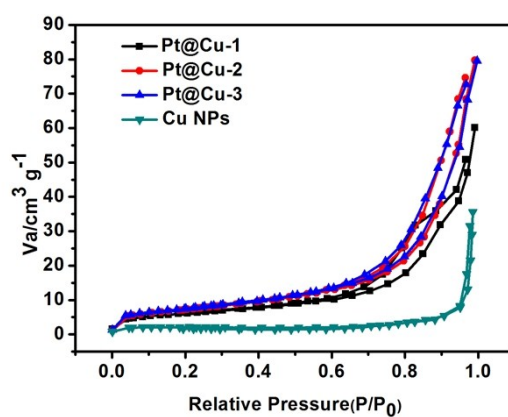

**Fig. S3** Nitrogen adsorption-desorption isotherm of Pt@Cu-1 NPs, Pt@Cu-2 NPs, Pt@Cu-3 NPs and pure Cu NPs

**Table S1** Specific surface area of different bimetal samples

| Sample      | Specific surface area (m <sup>2</sup> g <sup>-1</sup> ) |
|-------------|---------------------------------------------------------|
| Pt@Cu-1 NPs | 39.3                                                    |
| Pt@Cu-2 NPs | 40.6                                                    |
| Pt@Cu-3 NPs | 40.0                                                    |
| Cu NPs      | 6.0                                                     |

### 5. Characterization of Pt@ Cu-2 NPs after using

According to SEM patterns (Fig. S4), Pt@Cu-2 NPs preserved its particle morphology after using six times, only a little part of particles agglomerated into larger ones, most bimetal nanoparticles could remain its particle size. The TEM images (Fig. S5) did not show phase separation between Pt NPs and Cu NPs.

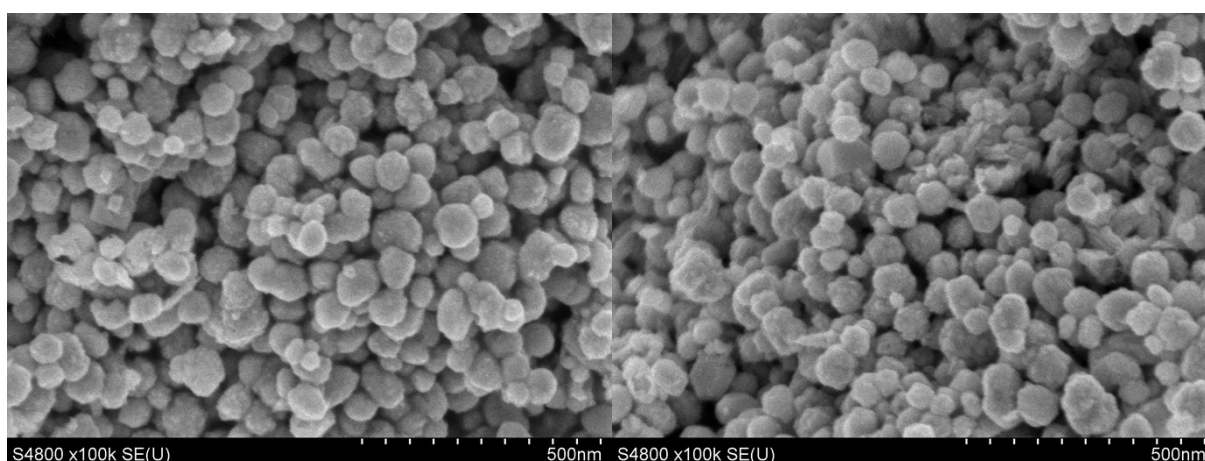

**Fig. S4** SEM patterns of Pt@Cu-2 NPs before using (left) and after using for six times (right).

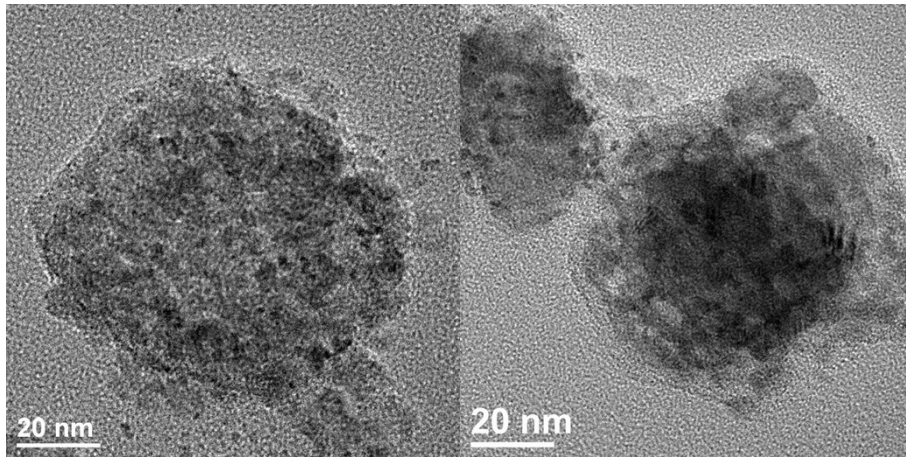

**Fig. S5** Low magnification TEM image of Pt@Cu-2 NPs before using (left) and after using for six times (right).
